# Supplementary material for: Biogas generation in anaerobic wastewater treatment under tetracycline antibiotic pressure
Source: PubMed Central journal article supplement (PMC4920035; doi:10.1038/srep28336), 2016-06-24
Supplement: srep28336-s1.pdf [file srep28336-s1.pdf]

## Supplementary Information for

# Biogas generation in anaerobic wastewater treatment under tetracycline antibiotic pressure

Meiqing Lu<sup>a,b</sup>, Xiaojun Niu<sup>a,b,c,\*</sup>, Wei Liu<sup>a,b</sup>, Jun Zhang<sup>a,b</sup>, Jie Wang<sup>a,b</sup>, Jia Yang<sup>a,b</sup>,

Wenqi Wang<sup>a,b</sup>, Zhiquan Yang<sup>a,b</sup>

<sup>a</sup> School of Environment and Energy, South China University of Technology, Guangzhou, 510006, PR China

<sup>b</sup> Guangdong Provincial Key Laboratory of Atmospheric Environment and Pollution Control, Guangzhou, 510640, PR China

<sup>c</sup> State Key Laboratory of Pollution Control and Resource Reuse, Nanjing, 210093, PR China

### Supporting figures

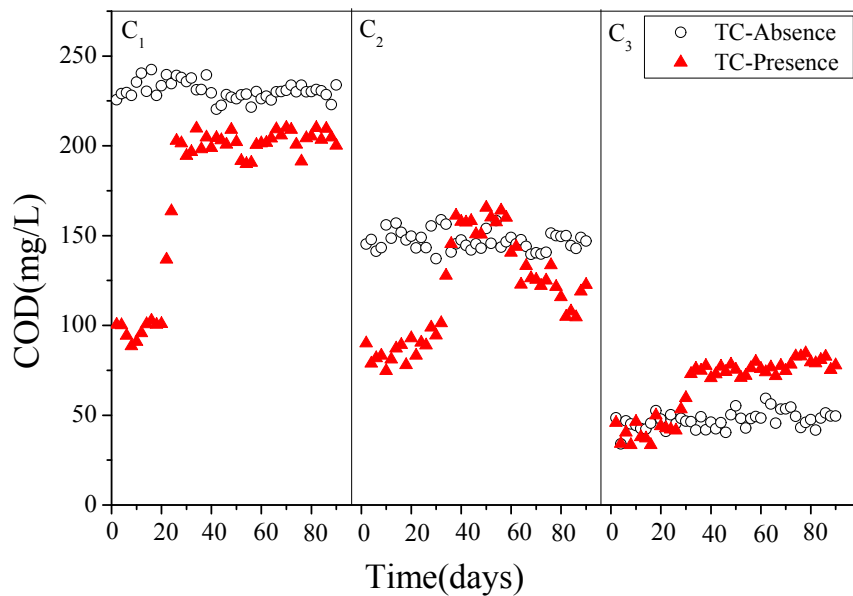

Figure S1 | Responses of effluent COD in each compartment of the reactor.
